# Supplementary material for: Magnitude of Treatment Abandonment in Childhood Cancer
Source: PubMed Central journal article supplement (PMC4589240; doi:10.1371/journal.pone.0135230), 2015-09-30
Supplement: pone.0135230.s002.pdf [file pone.0135230.s002.pdf]

**Table S2. Estimated annual cases of childhood cancer and magnitude of treatment abandonment worldwide**

| Income Category <sup>2</sup>                             | Reported Median Magnitude of TxA | Adjusted Reported Median of TxA <sup>3</sup> | Midpoint of Reported Median of TxA | Population 0-14 years (as % of population) <sup>4</sup> | Total Population <sup>4</sup> (n) | Population 0-14 years (n) | Incidence of childhood cancer <sup>5</sup> | Expected childhood cancer cases | Expected cases of TxA (adjusted) | Expected cases of TxA (un-adjusted) |
|----------------------------------------------------------|----------------------------------|----------------------------------------------|------------------------------------|---------------------------------------------------------|-----------------------------------|---------------------------|--------------------------------------------|---------------------------------|----------------------------------|-------------------------------------|
| High-income countries                                    | 0-5%                             | 0.5%                                         | 2.5%                               | 0.1731                                                  | 1,127,916,328                     | 195,315,431               | 135                                        | 26,368                          | 132                              | 659                                 |
| Upper-middle income                                      | 0-5%                             | 1.5%                                         | 2.5%                               | 0.2188                                                  | 2,472,498,041                     | 540,873,991               | 108                                        | 58,414                          | 876                              | 1,460                               |
| Lower-middle-income                                      | 16-25%                           | 20%                                          | 20%                                | 0.3197                                                  | 2,494,159,560                     | 797,334,693               | 101                                        | 80,531                          | 16,106                           | 16,106                              |
| Low-income countries                                     | 26-50%                           | 37.5%                                        | 37.5%                              | 0.3926                                                  | 799,803,865                       | 313,984,460               | 78                                         | 24,491                          | 9,184                            | 9,184                               |
| <b>ALL COUNTRIES COMBINED</b>                            |                                  |                                              |                                    |                                                         | <b>6,894,377,794</b>              | <b>1,847,508,576</b>      |                                            | <b>189,804</b>                  | <b>26,298</b>                    | <b>27,409</b>                       |
| <b>% TREATMENT ABANDONMENT (AS % OF TOTAL INCIDENCE)</b> |                                  |                                              |                                    |                                                         |                                   |                           |                                            |                                 | <b>13.9%</b>                     | <b>14.4%</b>                        |
| <b>ALL COUNTRIES COMBINED (RESTRICTED TO LMC)</b>        |                                  |                                              |                                    |                                                         |                                   |                           |                                            | <b>163,436</b>                  | <b>26,166</b>                    | <b>26,751</b>                       |
| <b>LMC BURDEN (AS % OF TOTAL BURDEN)</b>                 |                                  |                                              |                                    |                                                         |                                   |                           |                                            | <b>86.1%</b>                    | <b>99.5%</b>                     | <b>97.6%</b>                        |
