# Supplementary material for: Magnitude of Treatment Abandonment in Childhood Cancer
Source: PubMed Central journal article supplement (PMC4589240; doi:10.1371/journal.pone.0135230), 2015-09-30
Supplement: pone.0135230.s004.pdf [file pone.0135230.s004.pdf]

**Table S5. External validation: Correlation between country-level socioeconomic indicators and reported frequency of treatment abandonment**

|                                                                                       | n <sup>1</sup> | Spearman Coefficient <sup>2</sup> | 95% Conf. Interval | p-value |
|---------------------------------------------------------------------------------------|----------------|-----------------------------------|--------------------|---------|
| <b>Center-level indicators (for comparison)</b>                                       |                |                                   |                    |         |
| Likelihood of TxA                                                                     | 581            | <b>0.721</b>                      | 0.680, 0.759       | <0.0001 |
| Frequency of economic hardship                                                        | 549            | 0.424                             | 0.352, 0.490       | <0.0001 |
|                                                                                       |                |                                   |                    |         |
| <b>Country-level socioeconomic indicators<sup>3</sup></b>                             |                |                                   |                    |         |
| Health expenditure per capita (current US\$)                                          | 599            | <b>-0.593</b>                     | -0.643, -0.539     | <0.0001 |
| GDP per capita (current US\$)                                                         | 602            | <b>-0.558</b>                     | -0.611, -0.500     | <0.0001 |
| Vulnerable employment, total (% of total)                                             | 459            | <b>0.548</b>                      | 0.480, 0.608       | <0.0001 |
| Human Development Index (value)                                                       | 599            | <b>-0.535</b>                     | -0.589, -0.474     | <0.0001 |
| Income Category: World Bank Atlas Method <sup>4</sup> (LIC, LMIC, UMIC, HIC, ordinal) | 602            | <b>-0.522</b>                     | -0.578, -0.461     | <0.0001 |
| Mortality rate, under-5 (per 1,000 live births)                                       | 596            | 0.497                             | 0.433, 0.555       | <0.0001 |
| Poverty gap at \$2 a day (PPP) (%)                                                    | 412            | 0.473                             | 0.393, 0.544       | <0.0001 |
| Prevalence of undernourishment (% of population)                                      | 581            | 0.455                             | 0.388, 0.517       | <0.0001 |
| Life expectancy at birth, total (years)                                               | 598            | -0.437                            | -0.499, -0.369     | <0.0001 |
| Out-of-pocket health expenditure (% of total expenditure on health)                   | 596            | 0.413                             | 0.343, 0.477       | <0.0001 |
| Economically active children, total (% of children ages 7-14)                         | 283            | 0.387                             | 0.282, 0.481       | <0.0001 |
| Out-of-pocket health expenditure (% of private expenditure on health)                 | 596            | 0.32                              | 0.246, 0.390       | <0.0001 |
| Literacy rate, adult total (% of people ages 15 and above)                            | 470            | -0.27                             | -0.352, -0.184     | <0.0001 |

<sup>1</sup> Variable n is due to availability of the specified indicator for the country in the World Bank database.

<sup>2</sup> Correlation was considered strong if  $r \geq 0.7$ , moderate if  $r \geq 0.5$  but  $< 0.7$ , and weak if  $r < 0.5$ . Bold represents  $r \geq 0.5$ .

<sup>3</sup> Indicators obtained from World Bank and United Nations Development Program online databases.

<sup>4</sup> LIC = low-income country, LMIC = lower-middle-income country, UMIC = upper-middle-income country, HIC = high-income country
