# Supplementary material for: Magnitude of Treatment Abandonment in Childhood Cancer
Source: PLOS journal article supplement (doi:10.1371/journal.pone.0135230), 2015-09-30
Supplement: S3 (10.1371/journal.pone.0135230.s003) [file journal.pone.0135230.s003]

**Table S3. Provider and center demographics\***

| Responses                                               | Total |       | HIC |     | UMIC |     | LMIC |     | LIC |      |
|---------------------------------------------------------|-------|-------|-----|-----|------|-----|------|-----|-----|------|
|                                                         | 667   |       | 197 |     | 306  |     | 145  |     | 19  |      |
| Countries                                               | 101   |       | 36  |     | 29   |     | 26   |     | 10  |      |
|                                                         | n     | %     | n   | %   | n    | %   | n    | %   | n   | %    |
| <b>Occupation</b>                                       |       |       |     |     |      |     |      |     |     |      |
| Physician                                               | 561   | 84.1% | 142 | 72% | 279  | 91% | 121  | 83% | 19  | 100% |
| Nurse/nurse practitioner                                | 91    | 13.6% | 52  | 26% | 19   | 6%  | 20   | 14% | 0   | 0%   |
| Social Worker                                           | 1     | 0.1%  | 1   | 1%  | 0    | 0%  | 0    | 0%  | 0   | 0%   |
| Psychologist                                            | 10    | 1.5%  | 0   | 0%  | 6    | 2%  | 4    | 3%  | 0   | 0%   |
| Other                                                   | 4     | 0.6%  | 2   | 1%  | 2    | 1%  | 0    | 0%  | 0   | 0%   |
| <b>Type of Physician (n=556)</b>                        |       |       |     |     |      |     |      |     |     |      |
| Pediatric H/O                                           | 463   | 83.3% | 127 | 90% | 244  | 88% | 80   | 67% | 12  | 67%  |
| Adult H/O                                               | 15    | 2.7%  | 1   | 1%  | 5    | 2%  | 8    | 7%  | 1   | 6%   |
| General Pediatrician                                    | 29    | 5.2%  | 5   | 4%  | 7    | 3%  | 13   | 11% | 4   | 22%  |
| General Physician                                       | 2     | 0.4%  | 0   | 0%  | 0    | 0%  | 2    | 2%  | 0   | 0%   |
| Other                                                   | 47    | 8.5%  | 8   | 6%  | 22   | 8%  | 16   | 13% | 1   | 6%   |
| <b>Experience (years)</b>                               |       |       |     |     |      |     |      |     |     |      |
| 5 years and less                                        | 169   | 25%   | 37  | 19% | 79   | 26% | 45   | 31% | 8   | 42%  |
| 6 to 10 years                                           | 159   | 24%   | 40  | 20% | 74   | 24% | 40   | 28% | 6   | 32%  |
| 11 to 15 years                                          | 106   | 16%   | 38  | 19% | 44   | 14% | 22   | 15% | 2   | 11%  |
| 16 to 20 years                                          | 102   | 15%   | 31  | 16% | 53   | 17% | 17   | 12% | 1   | 5%   |
| More than 20 years                                      | 131   | 20%   | 51  | 26% | 57   | 19% | 21   | 14% | 2   | 11%  |
| <b>Sex</b>                                              |       |       |     |     |      |     |      |     |     |      |
| Female                                                  | 384   | 58%   | 110 | 56% | 191  | 62% | 75   | 52% | 8   | 42%  |
| <b>Source for opinion on TxA (n=602)</b>                |       |       |     |     |      |     |      |     |     |      |
| Database                                                | 195   | 32%   | 26  | 15% | 99   | 36% | 65   | 48% | 5   | 33%  |
| Personal opinion, but confident                         | 308   | 51%   | 125 | 71% | 124  | 45% | 52   | 38% | 7   | 47%  |
| Personal opinion, not experienced                       | 99    | 16%   | 25  | 14% | 52   | 19% | 19   | 14% | 3   | 20%  |
| <b>Center volume (new cases/year)</b>                   |       |       |     |     |      |     |      |     |     |      |
| 25 and less                                             | 100   | 15%   | 30  | 15% | 47   | 15% | 21   | 14% | 2   | 11%  |
| 26 to 50                                                | 134   | 20%   | 35  | 18% | 73   | 24% | 24   | 17% | 2   | 11%  |
| 51 to 100                                               | 145   | 22%   | 42  | 21% | 74   | 24% | 26   | 18% | 3   | 16%  |
| 101 to 200                                              | 148   | 22%   | 46  | 23% | 62   | 20% | 33   | 23% | 7   | 37%  |
| More than 200                                           | 140   | 21%   | 44  | 22% | 50   | 16% | 41   | 28% | 5   | 26%  |
| <b>Center type (n=661)</b>                              |       |       |     |     |      |     |      |     |     |      |
| Children's hospital                                     | 294   | 44%   | 118 | 61% | 123  | 40% | 50   | 35% | 3   | 16%  |
| Cancer hospital                                         | 114   | 17%   | 20  | 10% | 59   | 19% | 33   | 23% | 2   | 11%  |
| General hospital (children's ward)                      | 234   | 35%   | 56  | 29% | 110  | 36% | 55   | 38% | 13  | 68%  |
| Private clinic                                          | 19    | 3%    | 0   | 0%  | 13   | 4%  | 5    | 3%  | 1   | 5%   |
| <b>Primary funding source (n=655)</b>                   |       |       |     |     |      |     |      |     |     |      |
| Government                                              | 458   | 70%   | 134 | 69% | 254  | 85% | 66   | 46% | 4   | 22%  |
| Private insurance                                       | 39    | 6%    | 20  | 10% | 14   | 5%  | 5    | 3%  | 0   | 0%   |
| Out-of-pocket by family                                 | 63    | 10%   | 1   | 1%  | 18   | 6%  | 35   | 24% | 9   | 50%  |
| Non-governmental organization                           | 95    | 15%   | 38  | 20% | 14   | 5%  | 38   | 26% | 5   | 28%  |
| <b>Secondary funding source (n=611)</b>                 |       |       |     |     |      |     |      |     |     |      |
| Government                                              | 159   | 26%   | 46  | 27% | 68   | 23% | 39   | 29% | 6   | 43%  |
| Private insurance                                       | 126   | 21%   | 62  | 36% | 52   | 18% | 12   | 9%  | 0   | 0%   |
| Out-of-pocket by family                                 | 96    | 16%   | 21  | 12% | 38   | 13% | 32   | 24% | 5   | 36%  |
| Non-governmental organization                           | 230   | 38%   | 42  | 25% | 133  | 46% | 52   | 39% | 3   | 21%  |
| <b>Frequency of economic hardship at center (n=597)</b> |       |       |     |     |      |     |      |     |     |      |
| 0-25%                                                   | 221   | 37%   | 113 | 68% | 94   | 34% | 12   | 9%  | 2   | 11%  |
| 26-50%                                                  | 135   | 23%   | 34  | 21% | 80   | 29% | 21   | 16% | 0   | 0%   |
| 51-75%                                                  | 112   | 19%   | 11  | 7%  | 61   | 22% | 36   | 27% | 4   | 22%  |
| >75%                                                    | 129   | 22%   | 7   | 4%  | 44   | 16% | 66   | 49% | 12  | 67%  |

\* Response rate is 667 unless otherwise specified. See methods for details on definition for frequency of economic hardship.

HIC = High-income countries, UMIC = upper-middle-income countries, LMIC = lower-middle-income countries, LIC = low-income countries.
